# Supplementary material
Source: Springer Nature journal article supplement (https://www.springermedizin.de/resource/supplementary/13054_2011_552_MOESM4_ESM.pdf/9708758)

| Study                           | Restrictive |            | Routine   |            | Weight        | Risk Ratio<br>[95% CI]   |
|---------------------------------|-------------|------------|-----------|------------|---------------|--------------------------|
|                                 | Events      | Total      | Events    | Total      |               |                          |
| <b>Primary analysis: trials</b> |             |            |           |            |               |                          |
| Krivopal et al, 2003            | 12          | 51         | 11        | 43         | 25.9%         | 0.92 [0.45, 1.87]        |
| Clec'h et al, 2008              | 28          | 81         | 29        | 84         | 74.1%         | 1.00 [0.66, 1.52]        |
| <b>Total</b>                    | <b>40</b>   | <b>132</b> | <b>40</b> | <b>127</b> | <b>100.0%</b> | <b>0.98 [0.68, 1.41]</b> |

Overall effect:  $p=0.91$ ; heterogeneity:  $I^2=0\%$

**Sensitivity analysis: trials and observational studies**

|                       |            |             |            |             |               |                          |
|-----------------------|------------|-------------|------------|-------------|---------------|--------------------------|
| Leong et al, 2000     | 3          | 100         | 2          | 100         | 0.4%          | 1.50 [0.26, 8.79]        |
| Krinsley et al, 2003  | 256        | 1267        | 265        | 1297        | 55.5%         | 0.99 [0.85, 1.15]        |
| Krivopal et al, 2003  | 12         | 51          | 11         | 43          | 2.6%          | 0.92 [0.45, 1.87]        |
| Graat et al, 2007     | 104        | 622         | 132        | 754         | 23.8%         | 0.96 [0.76, 1.21]        |
| Hendrikse et al, 2007 | 38         | 250         | 79         | 486         | 10.3%         | 0.94 [0.66, 1.33]        |
| Clec'h et al, 2008    | 28         | 81          | 29         | 84          | 7.4%          | 1.00 [0.66, 1.52]        |
| <b>Total</b>          | <b>441</b> | <b>2371</b> | <b>518</b> | <b>2764</b> | <b>100.0%</b> | <b>0.98 [0.87, 1.09]</b> |

Overall effect:  $p=0.68$ ; heterogeneity:  $I^2=0\%$

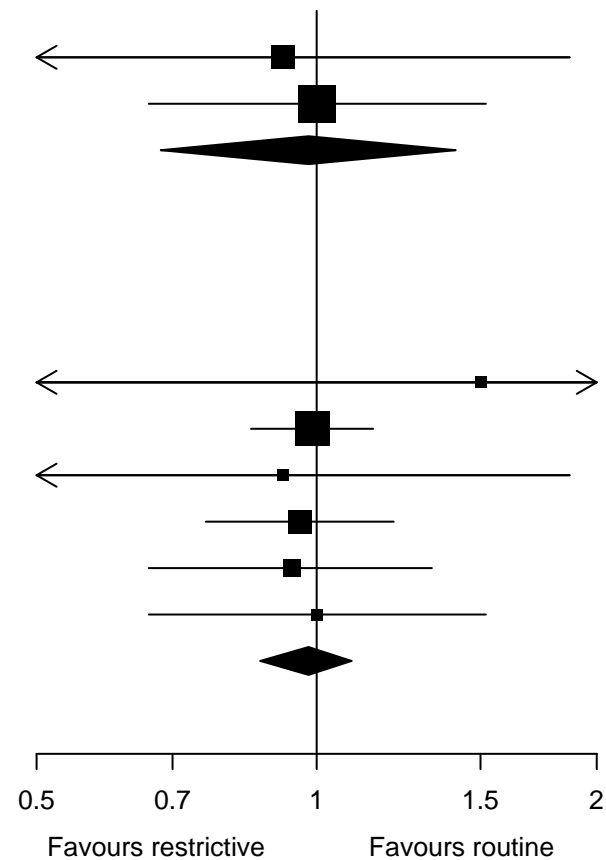

Supplement: MOESM4 [file 9708758]
